# Supplementary material
Source: HighWire-hosted journal article supplement (https://jitc.bmj.com/content/9/6/e002484)
Supplement: inline-supplementary-material-3 [file inline-supplementary-material-3.pdf]

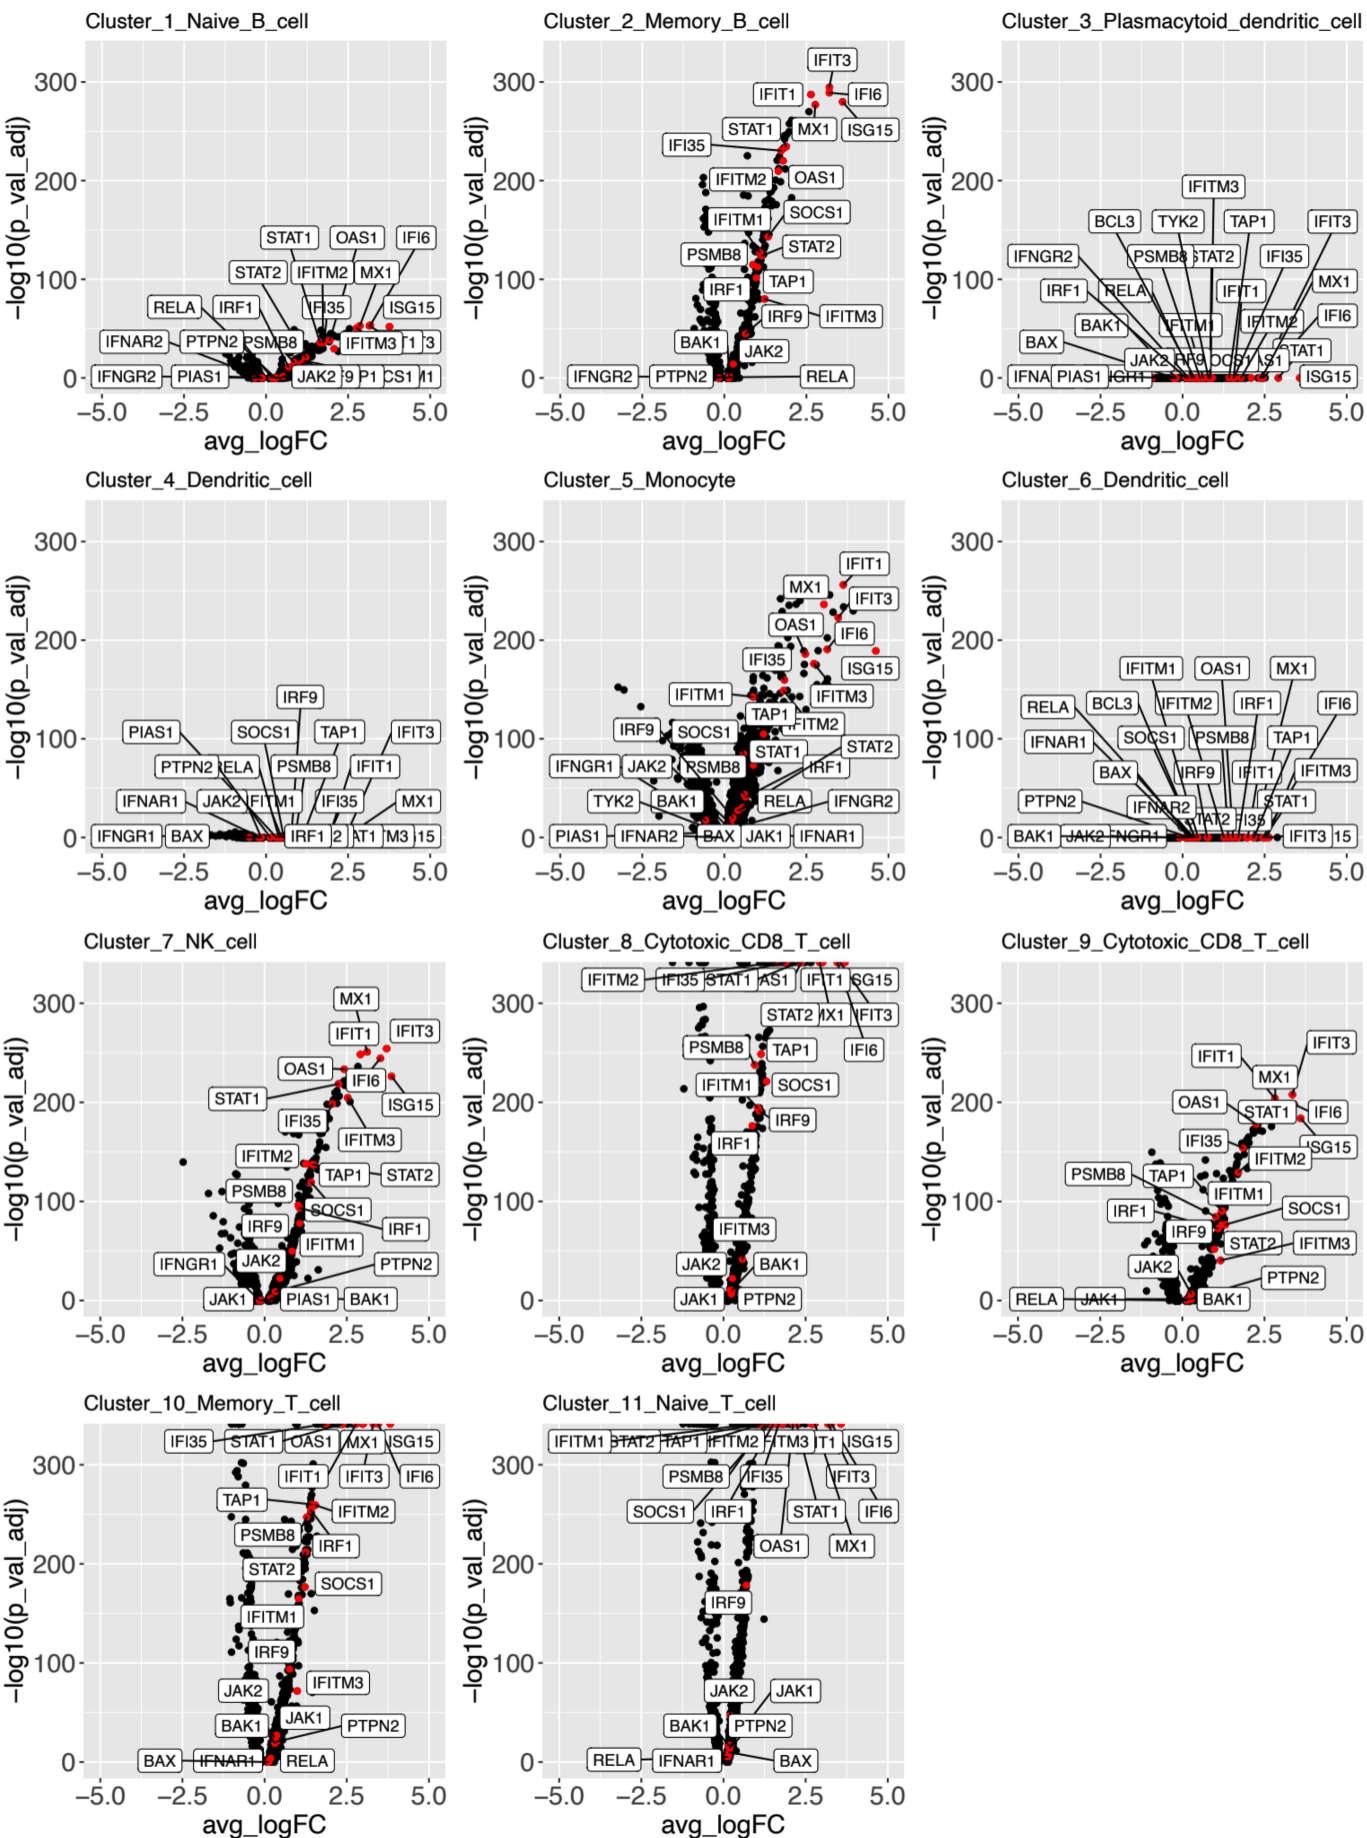

**Supplemental Figure 3. Impact of anti-Q $\beta$ -coated CMP-001 on gene expression in each cluster.** Differential expression (untreated versus treated) was assessed within each cluster of cells, with positive logFC values associated with increased expression in the anti-Q $\beta$ -coated CMP-001 treated cells. Genes involved in interferon signaling pathways (according to ingenuity pathway analysis) are labeled and colored in red.
