# Supplementary material
Source: HighWire-hosted journal article supplement (https://jitc.bmj.com/content/9/6/e002484)
Supplement: inline-supplementary-material-6 [file inline-supplementary-material-6.pdf]

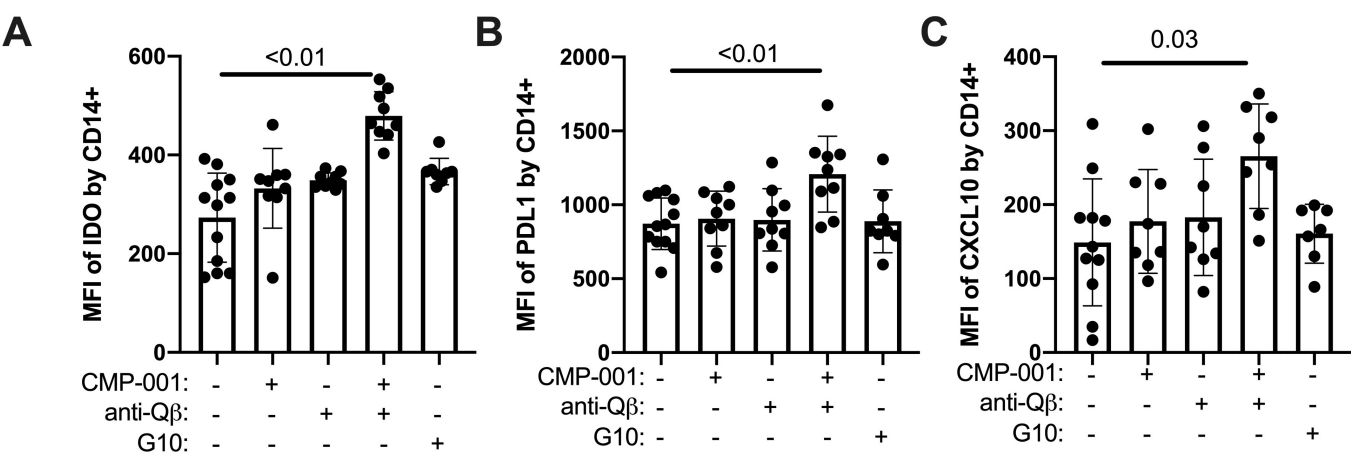

**Supplemental Figure 6. Phagocytosis of anti-Qβ-coated CMP-001 alone has a modest impact on monocyte phenotype.** Monocytes from healthy donors were treated with CMP-001 plus or minus anti-Qβ or G10 (soluble TLR9 agonist) for 18-20 hours. Impact on IDO (A), PDL1 (B), and CXCL10 (C) expression was determined by flow cytometry. Statistical significance was determined using mixed-effects analysis with multiple comparisons test with alpha = 0.05 (ns = not significant; n = 7-12).
