# Supplementary material
Source: HighWire-hosted journal article supplement (https://jitc.bmj.com/content/9/6/e002484)
Supplement: inline-supplementary-material-7 [file inline-supplementary-material-7.pdf]

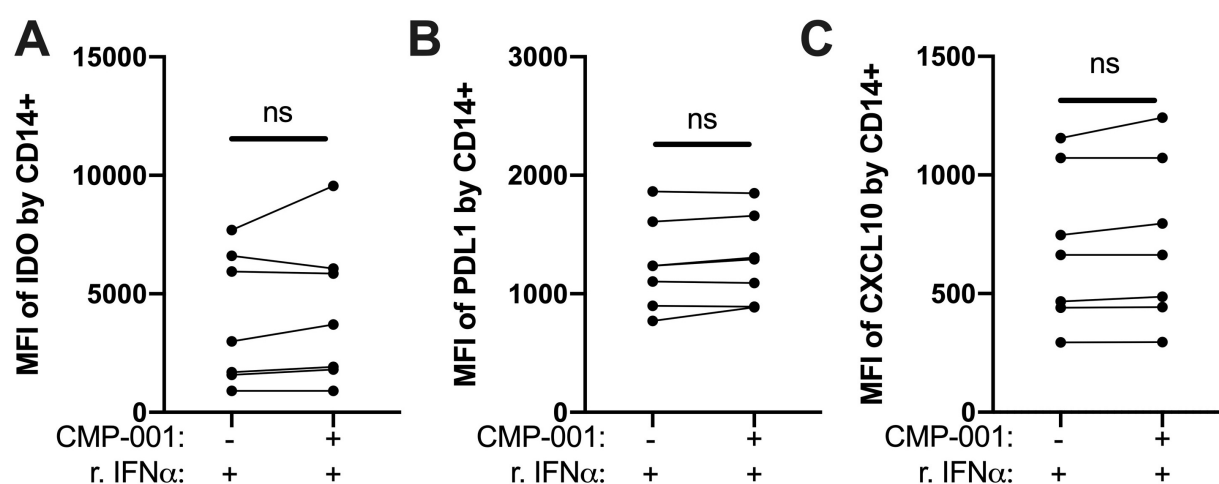

**Supplemental Figure 7. Phagocytosis of unopsonized CMP-001 has no impact on monocyte response to IFN $\alpha$ .** Monocytes from healthy donors were treated with recombinant IFN $\alpha$  plus or minus CMP-001 for 18-20 hours. Impact on IDO, PDL1 and CXCL10 expression was determined by flow cytometry. Statistical significance was determined using paired T-test with alpha = 0.05 (ns = not significant; n = 7).
