# Supplementary material
Source: HighWire-hosted journal article supplement (https://jitc.bmj.com/content/9/6/e002484)
Supplement: inline-supplementary-material-8 [file inline-supplementary-material-8.pdf]

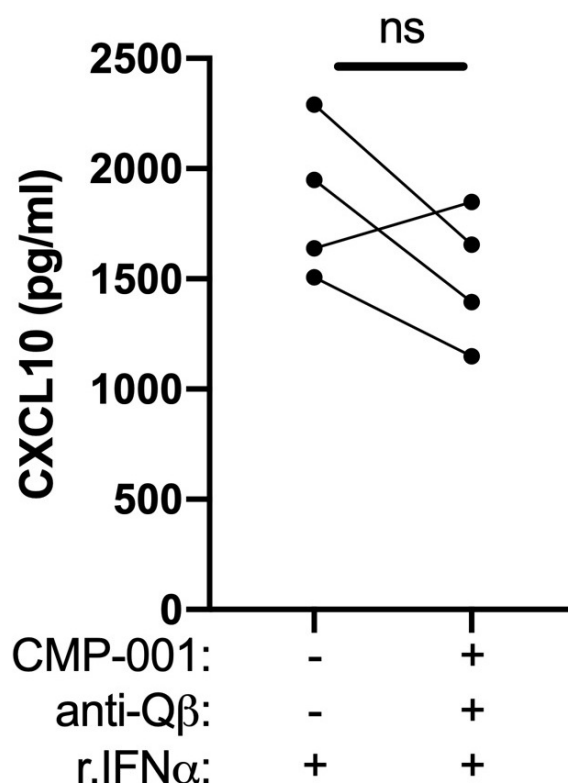

**Supplemental Figure 8. Phagocytosis of anti-Q $\beta$ -coated CMP-001 by monocytes has minimal impact on CXCL10 production in response to IFN $\alpha$ .** Monocytes from healthy donors were treated with recombinant IFN $\alpha$  plus or minus anti-Q $\beta$ -coated CMP-001 for 24 hours. Impact on CXCL10 production was determined by ELISA. Statistical significance was determined using paired t-test with alpha 0.05 (ns = not significant; n = 4).
